# Supplementary material for: Differential Eye Expression of Xenopus Acyltransferase Gnpat and Its Biochemical Characterization Shed Light on Lipid-Associated Ocular Pathologies
Source: PubMed Central journal article supplement — Invest Ophthalmol Vis Sci. 2023 May 19;64(5):17. doi: 10.1167/iovs.64.5.17 (PMC10204775; doi:10.1167/iovs.64.5.17), 2023-05-19
Supplement: iovs-64-5-17_s001.pdf [file iovs-64-5-17_s001.pdf]

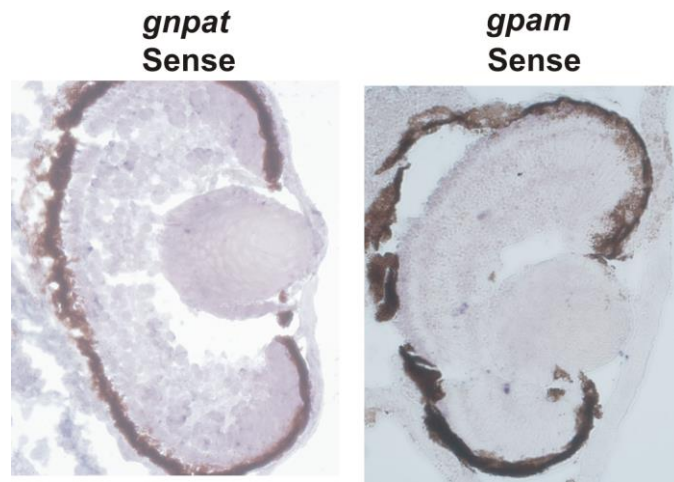

**Supplementary Figure 1:** ISH against *gnpat* and *gpam* with sense riboprobes in transverse retina sections from stage 39 tadpoles.
