# Supplementary material for: Differential Eye Expression of Xenopus Acyltransferase Gnpat and Its Biochemical Characterization Shed Light on Lipid-Associated Ocular Pathologies
Source: PubMed Central journal article supplement — Invest Ophthalmol Vis Sci. 2023 May 19;64(5):17. doi: 10.1167/iovs.64.5.17 (PMC10204775; doi:10.1167/iovs.64.5.17), 2023-05-19
Supplement: iovs-64-5-17_s002.pdf [file iovs-64-5-17_s002.pdf]

**Supplementary Table 1:** Plasmids used in this work.

| <b>Name</b>                                          | <b>Description</b>                                                                                                                                 | <b>Source</b>   |
|------------------------------------------------------|----------------------------------------------------------------------------------------------------------------------------------------------------|-----------------|
| pCS2-GFP                                             | GFP expression vector                                                                                                                              |                 |
| pCMV-Sport6                                          | Empty vector                                                                                                                                       | Invitrogen      |
| pCMV-Sport6- <i>Xl-gnpat</i>                         | Full length <i>Xl-gnpat</i> (Image clone 6946416)                                                                                                  | Open Biosystems |
| pCMV-Sport6- <i>Xl-gpam</i>                          | Full length <i>Xl-gpam</i> (Image clone 8070414)                                                                                                   | Open Biosystems |
| pCMV-Sport6- <i>Xl-gpam</i> -R317A                   | Full length <i>Xenopus laevis</i> ( <i>Xl-gpam</i> mut R317A                                                                                       | This study      |
| pCRII-TOPO- <i>Xl-gnpat</i> -5' end                  | Probes (Sense: XhoI + Sp6; Antisense: BamHI + T7)                                                                                                  | This study      |
| pCRII-TOPO- <i>Xl-gpam</i> -5' end                   | Probes (Sense: XhoI + Sp6; Antisense: BamHI + T7)                                                                                                  | This study      |
| pYES 2.1-TOPO                                        | Yeast vector, 2 $\mu$ , <i>URA3</i> selection marker, <i>GAL</i> inducible promoter, C-end V5 His <sub>6</sub> tags                                | Invitrogen      |
| <i>Xl-gnpat</i> -V5-His <sub>6</sub>                 | <i>Xl-gnpat</i> in pYES2.1                                                                                                                         | This study      |
| <i>Xl-gpam</i> -V5-His <sub>6</sub>                  | <i>Xl-gpam</i> in pYES2.1                                                                                                                          | This study      |
| <i>Xl-gpam</i> -R317A-V5-His <sub>6</sub>            | <i>Xl-gpam</i> -R317A-V5-His <sub>6</sub> in pYES 2.1                                                                                              | This study      |
| pDONR221                                             | Gateway donor vector for generation of entry clones                                                                                                | Invitrogen      |
| <i>Xl-gnpat</i> entry                                | <i>Xl-gnpat</i> in pDONR221                                                                                                                        | This study      |
| <i>Xl-Δ129N-gnpat</i> entry                          | Truncated <i>Xl-Δ129N-gnpat</i> (lacking exon1-3) in pDONR221                                                                                      | This study      |
| <i>Xl</i> -N <sup>129</sup> -end-entry               | N-end of <i>Xl-gnpat</i> (encoded by exons 1-3) in pDONR221                                                                                        | This study      |
| <i>Xl-gnpat</i> H145A entry                          | Entry clone for <i>Xl-gnpat</i> carrying H145A mutation with STOP codon in pDONR221                                                                | This study      |
| <i>Xl-gpam</i> -V5-His <sub>6</sub> entry            | Entry clone for <i>Xl-Gpam</i> -V5-His <sub>6</sub> X in pDONR221                                                                                  | This study      |
| <i>Xl-gpam</i> - R317A-V5-His <sub>6</sub> entry     | Entry clone for <i>Xl-Gpam</i> -R317A-V5-His <sub>6</sub> X in pDONR221                                                                            | This study      |
| pAG416GPD-ccdB                                       | Gateway yeast destination vector, <i>CEN</i> , <i>URA3</i> selection marker, for expression of proteins under the constitutive <i>GPD</i> promoter | 27              |
| pAG416GPD-ccdB-EGFP                                  | Gateway C-EGFP yeast destination vector ( <i>CEN</i> , <i>URA3</i> , <i>GPD</i> promoter)                                                          | 21              |
| pAG416GPD-EGFP-ccdB                                  | Gateway N-EGFP yeast destination vector ( <i>CEN</i> , <i>URA3</i> , <i>GPD</i> promoter)                                                          | 21              |
| pAG416GPD- <i>Xl-gnpat</i> -eGFP                     | <i>Xl-gnpat</i> -EGFP, in pAG416GPD                                                                                                                | This study      |
| pAG416GPD-EGFP- <i>Xl-gnpat</i>                      | EGFP- <i>Xl-gnpat</i> , in pAG416GPD                                                                                                               | This study      |
| pAG416GPD- <i>Xl-Δ129N-gnpat</i> -EGFP               | Truncated <i>Xl-gnpat</i> lacking amino end (129 aa)-EGFP, in pAG416GPD                                                                            | This study      |
| pAG416GPD-EGFP- <i>Xl-gnpat</i> -H145A               | EGFP- <i>Xl-gnpat</i> -H145A, in pAG416GPD                                                                                                         | This study      |
| pAG416GPD- <i>Xl-gpam</i> -V5-His <sub>6</sub>       | <i>Xl-gpam</i> -V5-His <sub>6</sub> in pAG416GPD                                                                                                   | This study      |
| pAG416GPD- <i>Xl-gpam</i> R317A-V5-His <sub>6</sub>  | <i>Xl-gpam</i> - R317A-V5-His <sub>6</sub> in pAG416GPD                                                                                            | This study      |
| pET-DEST42                                           | Gateway destination vector with C-terminal V5-His <sub>6</sub> (Bacterial expression)                                                              | Invitrogen      |
| <i>Xl-gnpat</i> -V5-His <sub>6</sub>                 | <i>Xl-gnpat</i> in pET-DEST42                                                                                                                      | This study      |
| <i>Xl</i> -N <sup>129</sup> -end-V5-His <sub>6</sub> | N-end of <i>Xl-gnpat</i> (encoded by exons 1-3) in pET-DEST42                                                                                      | This study      |
