# Supplementary material for: Differential Eye Expression of Xenopus Acyltransferase Gnpat and Its Biochemical Characterization Shed Light on Lipid-Associated Ocular Pathologies
Source: PubMed Central journal article supplement — Invest Ophthalmol Vis Sci. 2023 May 19;64(5):17. doi: 10.1167/iovs.64.5.17 (PMC10204775; doi:10.1167/iovs.64.5.17), 2023-05-19
Supplement: iovs-64-5-17_s003.pdf [file iovs-64-5-17_s003.pdf]

**Supplementary Table 2: Yeast and *E. coli* strains used**

| <b>Name</b>                   | <b>Genotype</b>                                                                                                                        | <b>Source</b> |
|-------------------------------|----------------------------------------------------------------------------------------------------------------------------------------|---------------|
| <b>Yeast strains</b>          |                                                                                                                                        |               |
| CMY201                        | <i>MATa ura3-1 his3-11,15 leu2-3,112 trp1-1 ade2-1 can1-100 sct1Δ::HIS3</i> (w303 background)                                          | 21            |
| CMY202                        | <i>MATa ura3-1 his3-11,15 leu2-3,112 trp1-1 ade2-1 can1-100 sct1Δ::HIS3</i> (w303 background)                                          | 21            |
| CMY203                        | <i>MATa ura3-1 his3-11,15 leu2-3,112 trp1-1 ade2-1 can1-100 gpt2Δ::TRP1</i> (w303 background)                                          | 21            |
| CMY204                        | <i>MATa ura3-1 his3-11,15 leu2-3,112 trp1-1 ade2-1 can1-100 gpt2Δ::TRP1</i> (w303 background)                                          | 21            |
| CMY228                        | <i>Mat a, ura3-1 his3-11,15 leu2-3, 112 trp1-1 ade2-1 can1-100 gpt2Δ::TRP1 sct1Δ::HIS3 [pGAL-GPT2-V5, URA3]</i> (w303 background)      | 21            |
| VZY72                         | <i>MAT ura3-1 his3-11, 15 leu2-3, 112 trp1-1 ade2-1 can1-100, gpt2Δ::TRP1 sct1Δ::HIS3 [pGAL::Xl-GPAT1-V5, URA3]</i> (w303 background)  | This study    |
| VZY73                         | <i>Mat ura3-1 his3-11, 15 leu2-3, 112 trp1-1 ade2-1 can1-100, gpt2Δ::TRP1 sct1Δ::HIS3 [pGAL::Xl-DHAPAT-V5, URA3]</i> (w303 background) | This study    |
| VZY55                         | <i>MATa, ura3-1 his3-11,15 leu2-3, 112 trp1-1 ade2-1 can1-100 gpt2Δ::TRP1 sct1Δ::HIS3 [pGAL-GPT2 LEU2]</i> (w303 background)           | This study    |
| BY4741                        | <i>MATa his3Δ leu2Δ met15Δ ura3Δ</i>                                                                                                   | Euroscarf     |
| <b><i>E. coli</i> strains</b> |                                                                                                                                        |               |
| DH5α                          | F-φ80dlacZΔM15 Δ( <i>lacZYA-argF</i> )U169 <i>deoR recA1 endA1 hsdR17(rk-mk+)phoA</i> supE44 λ- <i>thi 1 gyrA96 relA1</i>              | 29            |
| BL21(DE3)                     | F- <i>ompT hsdSB(rB-mB-)gal dcm</i> (DE3)                                                                                              | Invitrogen    |
