# Supplementary material for: Differential Eye Expression of Xenopus Acyltransferase Gnpat and Its Biochemical Characterization Shed Light on Lipid-Associated Ocular Pathologies
Source: PubMed Central journal article supplement — Invest Ophthalmol Vis Sci. 2023 May 19;64(5):17. doi: 10.1167/iovs.64.5.17 (PMC10204775; doi:10.1167/iovs.64.5.17), 2023-05-19
Supplement: iovs-64-5-17_s004.pdf [file iovs-64-5-17_s004.pdf]

**Supplementary Table 3** Primers used in this work

| <b>Name</b>    | <b>Sequence</b>                                                                     |
|----------------|-------------------------------------------------------------------------------------|
| ATG-GPAT1      | ATGGAGGAAGCCGTTTGCTCC                                                               |
| Rev-GPAT1      | CATAAAGCCCAGGATGAAGTC                                                               |
| ATG-DHAPAT     | ATGGGCAGCGTGTACTTGCAAG                                                              |
| Rev-DHAPAT     | AAGCCGTGCTGATGGAAACTTC                                                              |
| attB1-DHAPAT-F | GGGGACAAGTTTGTACAAAAAAGCAGGCTTCGAAGGAGATAGAACCATGGGCA<br>GCGTGTACTTG                |
| attB2-DHAPAT-R | GGGGACCACTTTGTACAAGAAAGCTGGGTCAAGCCGTGCTGATGGAAAC                                   |
| XL-R'          | GGGGACCACTTTGTACAAGAAAGCTGGGTCTGATGGAAACTTCTCTGTAAATAT<br>TTGCAC                    |
| XL-R-N-ter     | GGGGACCACTTTGTACAAGAAAGCTGGGTCCCTCTGTATGCCTTCCTCAT                                  |
| XL-F1+2+3      | GGGGACAAGTTTGTACAAAAAAGCAGGCTTCGAAGGAGATAGAACCATGTTGA<br>CTCAAGCCATTCAAGAACATCCAGTT |
| DHAPAT-Seq     | GCCATGGAGCCGTTTTTCAAAGGTGA                                                          |
| xIDPAT-H145A-F | CCAGTTGTGCTGCTTCCCAGTGCCCGAAGCTACA                                                  |
| xIDPAT-H145A-R | TGTAGCTTCGGGCACTGGGAAGCAGCACAACTGG                                                  |
| xIGPAT1-F      | GGGGACAAGTTTGTACAAAAAAGCAGGCTTCACCATGGAGGAAGCCGTTTGCTC<br>CCTG                      |
| pYES2.1-His6-R | GGGGACCACTTTGTACAAGAAAGCTGGGTCTCAATGGTGATGGTGATGGTGACC<br>GGT                       |
| Gpat1 R317A-F  | CTGGAGGGGACGGCGTCCCGTAGTGGAAG                                                       |
| Gpat1 R317A-R  | CTTCCACTACGGGACGCCGTCCCCTCCAG                                                       |
